# Supplementary material for: A randomized trial of the efficacy and safety of quilizumab in adults with inadequately controlled allergic asthma
Source: Springer Nature journal article supplement (doi:10.1186/s12931-016-0347-2), 2016-03-18
Supplement: MOESM1 [file 9759934]

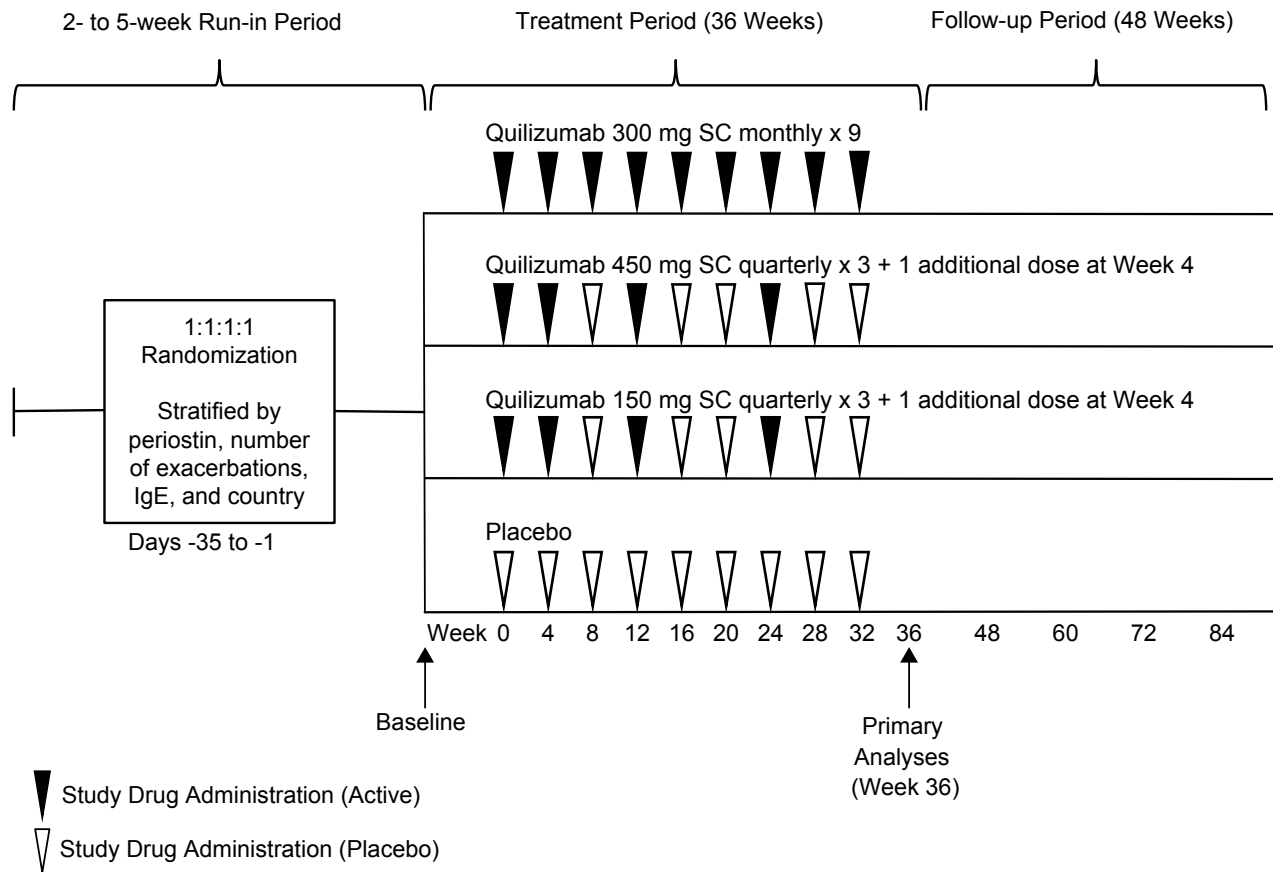

Figure S1. Study design. SC, subcutaneous.

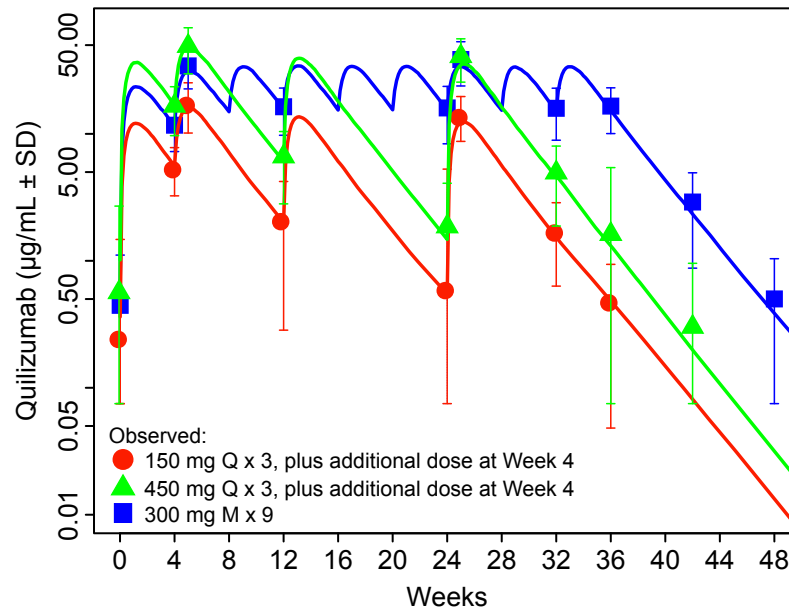

**Figure S2. Pharmacokinetics of quilizumab in asthma patients.** Symbols indicate observed values; lines indicate predicted values. M, monthly; Q, quarterly; SD, standard deviation.

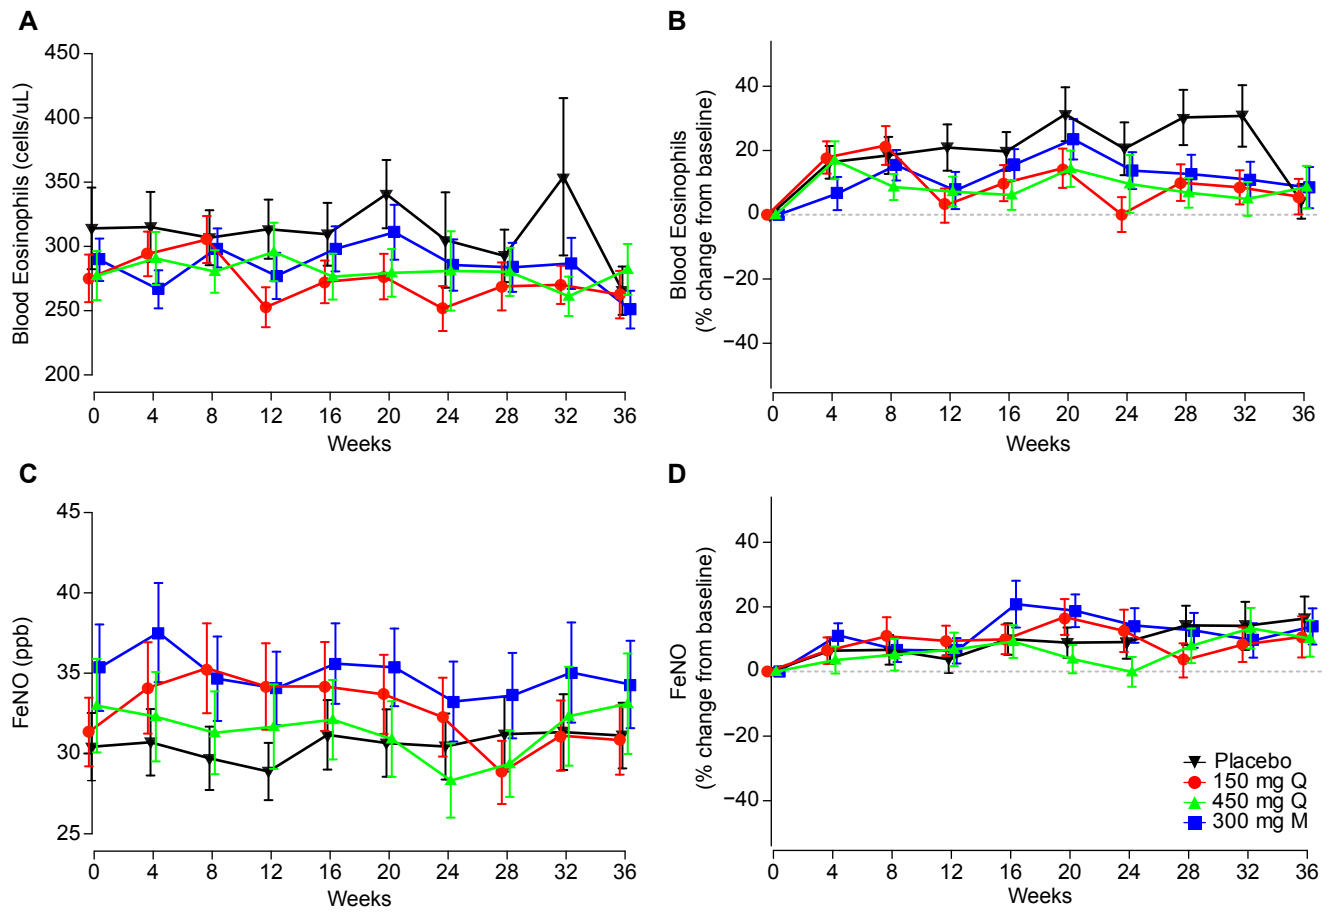

**Figure S3. Effect of quiluzumab on blood eosinophils (A, B) and FeNO (C, D) from baseline to Week 36.** Levels were represented as the mean  $\pm$  standard error (SE; A, C) and the mean  $\pm$  SE percent change from baseline (B, D). All data analysis was based on observed values. M, monthly; Q, quarterly.
